# Supplementary material
Source: publisher figshare collection journal article supplement (https://gsapubs.figshare.com/ndownloader/files/23313866)
Supplement: Supplementary file 1 [file 23313866]

## Sheet: Volcanoes
Volcano	Arc Position	Latitude (°N)	Longitude (°E)	Status	Last eruption/Age	Source	Geochemical datasets [#samples]
Aliso	Main Arc	-0.53	-78	Active	2450 BCE	Global Volcanism Program, Volcanoes of the World
Almas Santas	Arc Front	-0.59	-78.854	Extinct	?	Eissen et al. 2005	Hidalgo et al., 2012 [24], Ancellin et al (2017) [2]
Altar	Main Arc	-1.67	-78.42	Extinct	Pleistocene	Global Volcanism Program, Volcanoes of the World
Antisana	Main Arc	-0.484	-78.142	Active	1801 CE	Global Volcanism Program, Volcanoes of the World	Barragán et al., 1998 [2], Bourdon et al (2002) [17], Bourdon et al (2003) [3], Bryant et al. (2006) [3]
Atacazo	Arc Front	-0.357	-78.619	Active	320 BCE	Global Volcanism Program, Volcanoes of the World	Barragán et al., 1998 [2], Bourdon et al (2003) [2], Bryant et al. (2006) [2], Hidalgo et al. (2012) [108], Ancellin et al (2017) [1]
Azufral de Tuquerres	Colombia	1.097	-77.732	Active	930 BCE	Global Volcanism Program, Volcanoes of the World	Ancellin et al. (2017) [6]
Calpi	Main Arc	-1.637	-78.734	Extinct	Pleistocene	Global Volcanism Program, Volcanoes of the World	Ancellin et al. (2017) [1]
Carihuairazo	Arc Front	-1.408	-78.751	Extinct	Pleistocene	Global Volcanism Program, Volcanoes of the World	Ancellin et al. (2017) [11]
Casitagua	Arc Front	-0.039	-78.512	Extinct	Pleistocene	Global Volcanism Program, Volcanoes of the World	Ancellin et al. (2017) [1]
Cayambe	Main Arc	0.027	-77.989	Active	1785 CE	Global Volcanism Program, Volcanoes of the World	Samaniego et al. (2005) [53], Ancellin et al. (2017) [4]
Cerro Puntas	Main Arc	-0.174	-78.2	Extinct	Pleistocene	Global Volcanism Program, Volcanoes of the World
Chacana	Main Arc	-0.375	-78.25	Active	1773 CE	Global Volcanism Program, Volcanoes of the World	Bryant et al. (2006) [6], Chiaradia et al. (2009) [14], Ancellin et al (2017) [1]
Chachimbiro	Arc Front	0.465	-78.289	Active	3740 BCE	Global Volcanism Program, Volcanoes of the World	Ancellin et al. (2017) [9]
Chalpatán	Main Arc	0.7	-77.79	Extinct	Pleistocene: 2.06±0.07– 1.20±0.10 Ma (K-Ar)	Global Volcanism Program, Volcanoes of the World, Barberi et al., 1988
Chalupas	Main Arc	-0.78	-78.329	Extinct	Pleistocene	Global Volcanism Program, Volcanoes of the World	Bryant et al. (2006) [1], Garrison et al. (2011) [5], Ancellin et al. (2017) [1]
Chiles/Cerro Negro de Mayasquer	Arc Front	0.828	-77.964	Active	1936 CE	Global Volcanism Program, Volcanoes of the World
Chiltazón	Arc Front	0.687	-78.021	Extinct	Pleistocene	Global Volcanism Program, Volcanoes of the World
Chimborazo	Arc Front	-1.48	-78.82	Active	550 CE	Global Volcanism Program, Volcanoes of the World	Ancellin et al. (2017) [123]
Conos de Puyo	Arc Rear	-1.479	-77.788	Extinct	Pleistocene: 190±7 ka (40Ar/39Ar)	Global Volcanism Program, Volcanoes of the World, Hoffler et al., 2008	Hoffer et al. (2008) [39], Ancellin et al (2017) [1]
Corazon/Cerro Bombo	Arc Front	-0.531	-78.659	Extinct	Pleistocene	Global Volcanism Program, Volcanoes of the World	Ancellin et al. (2017) [1]
Cotacachi	Arc Front	0.361	-78.348	Extinct	Pleistocene	Global Volcanism Program, Volcanoes of the World	Samaniego et al. (2005) [1], Ancellin et al. (2017) [10]
Cotopaxi	Main Arc	-0.677	-78.436	Active	2015 CE	Global Volcanism Program, Volcanoes of the World	Bryant et al. (2006) [2], Garrison et al. (2011) [77]
Cuicocha	Arc Front	0.304	-78.366	Active	950 BCE	Global Volcanism Program, Volcanoes of the World	Ancellin et al. (2017) [21]
Cusin	Main Arc	0.127	-78.154	Extinct	Pleistocene	Global Volcanism Program, Volcanoes of the World
El Reventador	Arc Rear	-0.081	-77.659	Active	2008 CE	Global Volcanism Program, Volcanoes of the World	Samaniego et al. (2008) [14], Ancellin et al. (2017) [3]
Galeras	Colombia	1.227	-77.375	Active	2014 CE	Global Volcanism Program, Volcanoes of the World	Ancellin et al. (2017) [22]
Huisla	Main Arc	-1.4	-78.572	Extinct		Ancellin et al (2017)	Ancellin et al. (2017) [27]
Igualata	Main Arc	-1.49	-78.639	Extinct	Pleistocene	Global Volcanism Program, Volcanoes of the World
Iguan	Arc Front	0.621	-78.007	Extinct	Pleistocene	Global Volcanism Program, Volcanoes of the World
Ilaló	Main Arc	-0.259	-78.418	Extinct	Pleistocene: 1.62±0.16 (K-Ar)	Global Volcanism Program, Volcanoes of the World	Bryant et al. (2006) [1], Chiaradia et al. (2009) [4]
Iliniza	Arc Front	-0.662	-78.716	Active	Holocene	Global Volcanism Program, Volcanoes of the World	Hidlago et al. (2007) [35], Ancellin et al. (2017) [3]
Imbabura	Main Arc	0.261	-78.18	Active	5550 BCE	Global Volcanism Program, Volcanoes of the World	Bryant et al. (2006) [19], Ancellin et al (2017) [6]
Licto	Main Arc	-1.784	-78.615	Active	Late-Pleistocene or Holocene	Global Volcanism Program, Volcanoes of the World	Ancellin et al. (2017) [1]
Llimpi	Main Arc	-1.381	-78.572	Extinct	Pleistocene	Global Volcanism Program, Volcanoes of the World
Mojanda - Fuya Fuya	Main Arc	0.133	-78.294	Active	possible Holocene age.	Global Volcanism Program, Volcanoes of the World	Robin et al. (2009) [10], Ancellin et al. (2017) [3]
Pambamarca	Main Arc	-0.076	-78.207	Extinct	Pleistocene	Global Volcanism Program, Volcanoes of the World
Pan de Azucar	Arc Rear	-0.432	-77.719	Extinct	Pleistocene, 1.15±0.07 Ma	Global Volcanism Program, Volcanoes of the World, Hoffer 2008 PhD thesis (see ref in Le Voyer et al., 2008)	Hoffer (2008) [18], Ancellin et al. (2017) [2]
Pasochoa	Main Arc	-0.467	-78.481	Extinct	Pleistocene	Global Volcanism Program, Volcanoes of the World	Hidalgo et al. (2007) [1]
Pichincha	Arc Front	-0.177	-78.599	Active	2009 CE	Global Volcanism Program, Volcanoes of the World	Bryant et al. (2006) [1], Chiaradia et al. (2009) [10], Samaniego et al. (2010) [46], Ancellin et al. (2017) [6]
Pilavo	Arc Front	0.523	-78.367	Extinct	Pleistocene	Global Volcanism Program, Volcanoes of the World	Ancellin et al. (2017) [2]
Pululahua	Arc Front	0.035	-78.466	Active	290 CE	Global Volcanism Program, Volcanoes of the World	Bryant et al. (2006) [12], Chiaradia et al. (2009) [5], Ancellin et al. (2017) [2]
Puñalica	Main Arc	-1.399	-78.679	Extinct	Late Pleistocene, 18-14 ka	Global Volcanism Program, Volcanoes of the World	Ancellin et al (2017) [5]
Putzalagua	Main Arc	-0.962	-78.56	Extinct	Pleistocene	Global Volcanism Program, Volcanoes of the World
Quilotoa	Arc Front	-0.865	-78.892	Active	1797 CE	Global Volcanism Program, Volcanoes of the World	Ancellin et al (2017) [13], Bryant et al. (2006) [1]
Rumiñahui	Main Arc	-0.578	-78.504	Extinct	Pleistocene	Global Volcanism Program, Volcanoes of the World
Sagoatoa	Main Arc	-1.151	-78.666	Extinct	Pleistocene	Global Volcanism Program, Volcanoes of the World
Sangay	Main Arc	-2.005	-78.341	Active	2018 CE	Global Volcanism Program, Volcanoes of the World	Barragán et al., 1998 [12], Bryant et al. (2006) [1], Ancellin et al. (2017) [1]
Santa Cruz	Main Arc	-0.648	-78.631	Extinct	Pleistocene	Global Volcanism Program, Volcanoes of the World
Sincholagua	Main Arc	-0.534	-78.371	Extinct	Pleistocene	Global Volcanism Program, Volcanoes of the World
Soche	Main Arc	0.551	-77.582	Active	6650 BCE	Global Volcanism Program, Volcanoes of the World	Ancellin et al (2017) [11]
Sumaco	Arc Rear	-0.541	-77.627	Active	1933 CE	Global Volcanism Program, Volcanoes of the World	Barragán et al., 1998 [2], Bourdon et al (2003) [2], Bryant et al. (2006) [3], Chiaradia et al. (2009) [14], Ancellin et al (2017), [15], Garrison et al. (2018) [22]
Tungurahua	Main Arc	-1.47	-78.444	Active	2011 CE	Global Volcanism Program, Volcanoes of the World	Samaniego et al. (2011) [12], Ancellin et al (2017) [8], Nauret et al. (2018) [33]
Yanaurcu de Piñán	Arc Front	0.484	-78.329	Extinct	Pleistocene	Global Volcanism Program, Volcanoes of the World

## Sheet: References
References
Ancellin et al., 2017	Ancellin, M. A. et al. Across‐arc versus along‐arc Sr‐Nd‐Pb isotope variations in the Ecuadorian volcanic arc. Geochemistry, Geophysics, Geosystems 18, 1163-1188 (2017).
Barragan et al., 1998	Barragan, R., Geist, D., Hall, M., Larson, P. & Kurz, M. Subduction controls on the compositions of lavas from the Ecuadorian Andes. Earth and Planetary Science Letters 154, 153-166 (1998).
Bourdon et al., 2002	Bourdon, E. et al. Adakite-like lavas from Antisana Volcano (Ecuador): evidence for slab melt metasomatism beneath Andean Northern Volcanic Zone. Journal of Petrology 43, 199-217 (2002).
Bourdon et al., 2003	Bourdon, E. et al. Magmatic response to early aseismic ridge subduction: the Ecuadorian margin case (South America). Earth and Planetary Science Letters 205, 123-138 (2003).
Bryant et al., 2006	Bryant, J., Yogodzinski, G., Hall, M., Lewicki, J. & Bailey, D. Geochemical constraints on the origin of volcanic rocks from the Andean Northern Volcanic Zone, Ecuador. Journal of petrology 47, 1147-1175 (2006).
Chiaradia et al., 2009	Chiaradia, M., Müntener, O., Beate, B. & Fontignie, D. Adakite-like volcanism of Ecuador: lower crust magmatic evolution and recycling. Contributions to Mineralogy and Petrology 158, 563-588 (2009).
Garrison et al., 2011	Garrison, J. M., Davidson, J. P., Hall, M. & Mothes, P. Geochemistry and petrology of the most recent deposits from Cotopaxi Volcano, Northern Volcanic Zone, Ecuador. Journal of Petrology 52, 1641-1678 (2011).
Garrison et al., 2018	Garrison, J. M. et al. Shallow-level differentiation of phonolitic lavas from Sumaco Volcano, Ecuador. Contributions to Mineralogy and Petrology 173, 6 (2018).
Hidalgo et al., 2007	Hidalgo, S. et al. Adakitic magmas in the Ecuadorian volcanic front: petrogenesis of the Iliniza volcanic complex (Ecuador). Journal of Volcanology and Geothermal Research 159, 366-392 (2007).
Hidalgo et al., 2012	Hidalgo, S., Gerbe, M. C., Martin, H., Samaniego, P. & Bourdon, E. Role of crustal and slab components in the Northern Volcanic Zone of the Andes (Ecuador) constrained by Sr–Nd–O isotopes. Lithos 132, 180-192 (2012).
Hoffer 2008	Hoffer, G. Fusion partielle d'un manteau métasomatisé par un liquide adakitique: approches géochimique et expérimentale de la genèse et de l'évolution des magmas de l'arrière-arc équatorien, Université Blaise Pascal-Clermont-Ferrand II, (2008).
Hoffer et al., 2008	Hoffer, G. et al. Geochemical and petrological constraints on rear-arc magma genesis processes in Ecuador: The Puyo cones and Mera lavas volcanic formations. Journal of Volcanology and Geothermal Research 176, 107-118 (2008).
Nauret et al., 2018	Nauret, F. et al. The genetic relationship between andesites and dacites at Tungurahua volcano, Ecuador. Journal of Volcanology and Geothermal Research (2017).
Robin et al., 2009	Robin, C. et al. Evolution of the late Pleistocene Mojanda–Fuya Fuya volcanic complex (Ecuador), by progressive adakitic involvement in mantle magma sources. Bulletin of Volcanology 71, 233 (2009).
Samaniego et al., 2005	Samaniego, P. et al. Temporal evolution of magmatism in the Northern Volcanic Zone of the Andes: the geology and petrology of Cayambe Volcanic Complex (Ecuador). Journal of petrology 46, 2225-2252 (2005).
Samaniego et al., 2008	Samaniego, P. et al. Pre-eruptive physical conditions of El Reventador volcano (Ecuador) inferred from the petrology of the 2002 and 2004–05 eruptions. Journal of Volcanology and Geothermal Research 176, 82-93 (2008).
Samaniego et al., 2010	Samaniego, P., Robin, C., Chazot, G., Bourdon, E. & Cotten, J. Evolving metasomatic agent in the Northern Andean subduction zone, deduced from magma composition of the long-lived Pichincha volcanic complex (Ecuador). Contributions to Mineralogy and Petrology 160, 239-260 (2010).
Samaniego et al., 2011	Samaniego, P., Le Pennec, J.-L., Robin, C. & Hidalgo, S. Petrological analysis of the pre-eruptive magmatic process prior to the 2006 explosive eruptions at Tungurahua volcano (Ecuador). Journal of Volcanology and Geothermal Research 199, 69-84 (2011).
